# Supplementary material for: Awareness of infant safe sleep messages and associated care practices: findings from an Australian cohort of families with young infants
Source: PubMed Central journal article supplement — BMJ Paediatr Open. 2021 Feb 24;5(1):e000972. doi: 10.1136/bmjpo-2020-000972 (PMC7908297; doi:10.1136/bmjpo-2020-000972), 2021-02-24
Supplement: bmjpo-2020-000972supp001.pdf [file bmjpo-2020-000972supp001.pdf]

## 2017 Queensland Infant Care Study Questionnaire

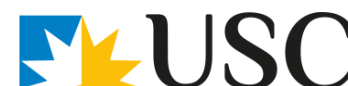

Unique 4-Letter Code:  (Providing your unique code will remove you from the Registry of Births, Deaths and Marriages reminder list)

Today's Date:  /  /  (the date you started filling in this questionnaire)

Caregiver completing questionnaire: ☐ Mother  
☐ Father/partner  
☐ Other caregiver (e.g. Kinship carer, Grandmother): \_\_\_\_\_

Was baby a multiple birth? (e.g. a twin) ☐ Yes ☐ No

If you have had a multiple birth, please answer the questionnaire for the baby who is the eldest.

## Baby's Details

1. Baby's date of birth?  April 2017

2. Baby's gender? ☐ Boy ☐ Girl

3. Baby's birth weight?  grams  
OR  lbs  oz

4. Length of pregnancy?  weeks of gestation  
- If unsure, was baby premature (born before 37 weeks)?  
☐ Yes ☐ No

5. Was baby admitted to a Special Care Nursery or Neonatal Intensive Care Unit? ☐ Yes ☐ No

6. Place of birth (e.g. Nambour Hospital or home birth)?  
\_\_\_\_\_

7. Indigenous status of baby?

- ☐ Aboriginal  
☐ Torres Strait Islander  
☐ Both Aboriginal & Torres Strait Islander  
☐ Neither Aboriginal nor Torres Strait Islander

8. How many people (not including baby) usually live in baby's household?

- children (0-13 years old)  
 adults (14+ years old)

9. What is baby's postcode?

10. What is baby's usual suburb of residence?  
\_\_\_\_\_

## Feeding

1. How was baby fed when baby arrived home from hospital (or day 3 after home-birth)?

- ☐ Breastmilk only ☐ Mostly breastmilk with some infant formula  
☐ Infant formula only ☐ Mostly infant formula with some breastmilk

2. How was baby fed over the last 2 days?

- ☐ Breastmilk only ☐ Mostly breastmilk with some infant formula  
☐ Infant formula only ☐ Mostly infant formula with some breastmilk

- If baby had infant formula only over the last 2 days, how old was baby when he/she last had any breastmilk?

- ☐ never had breastmilk ☐ less than 7 days old  weeks old

3. Has baby ever had any soft, semi-soft or solid foods (such as mashed food or infant cereal e.g. Farex)?

- ☐ Yes ☐ No

- If YES, how old was baby when baby first ate these foods?  weeks old

4. Has baby ever been given any medication or substances that you thought might help baby settle or sleep?

- ☐ No, baby has only been given milk feeds or baby foods  
☐ Panadol ☐ Nurofen  
☐ Colic/wind drops ☐ Alcohol (e.g. dash of whisky in bottle)  
☐ Other type(s) of substance, drink or medicine(s): \_\_\_\_\_

### Dummy (Pacifier) Use

1. Did baby use a dummy **at any time yesterday**? ☐ Yes ☐ No

2. Did baby use a dummy **at any time during the last 2 weeks**? ☐ Yes ☐ No

- If **YES, 2a)** What age did baby **first** start using a dummy?

☐ less than 7 days old

weeks old

2b) When does baby **usually** use a dummy? (mark all that apply)

☐ while awake between feeds

☐ for daytime sleeps

☐ for night-time sleeps

☐ other: \_\_\_\_\_

2c) Do you use a clip or chain to secure the dummy to baby's clothes, pram or bedding?

☐ Yes ☐ No

- If **YES**, what type of dummy clip or chain do you use?

☐ fabric/material design ☐ bead design ☐ chain link design ☐ other: \_\_\_\_\_

### Health Advice

1. Do you remember receiving any advice about safe sleeping for baby? ☐ Yes ☐ No

-If **YES**, who gave you this advice? (mark all that apply)

☐ Doctor/GP

☐ Nurse/Midwife

☐ Family/Friends

☐ Antenatal classes

☐ Internet

☐ Books/Brochures

☐ Previous experience ☐ Baby store/shop/expo

☐ Social Media (Facebook, Twitter)

☐ Media (TV, radio, magazines)

☐ Other: \_\_\_\_\_

2. Who or what was your **main** source of advice?

\_\_\_\_\_

3. Would you have liked to receive more information about safe sleeping from your healthcare workers (e.g. Doctor, Midwife)? ☐ Yes ☐ No

-If **YES**, what would you have liked to receive more information about? \_\_\_\_\_

\_\_\_\_\_

\_\_\_\_\_

\_\_\_\_\_

4. Have you ever heard of Sudden Unexpected Death in Infancy (SUDI) which includes Sudden Infant Death Syndrome (SIDS) and fatal sleeping accidents?

☐ Yes ☐ No

5. Can you list any key safe sleeping recommendations that reduce the risk of sudden unexpected death in infancy? ☐ Yes ☐ No

• \_\_\_\_\_

• \_\_\_\_\_

• \_\_\_\_\_

• \_\_\_\_\_

• \_\_\_\_\_

• \_\_\_\_\_

• \_\_\_\_\_

• \_\_\_\_\_

• \_\_\_\_\_

6. Do you find any of the recommendations difficult to do with baby? ☐ Yes ☐ No

- If **YES**, **which recommendation(s)** do you find the most difficult and **why** is it difficult?

\_\_\_\_\_

\_\_\_\_\_

\_\_\_\_\_

\_\_\_\_\_

## Sleeping Room

1. Who slept in the same room as baby for most of **last night?** (mark all that apply)

- ☐ baby slept in room alone  
☐ mother ☐ father/partner  
☐ other children, how many?    
☐ other adults, how many?    
☐ pets

2. Who **usually** slept in the same room as baby during the **last 2 weeks** for night-time sleeps? (mark all that apply)

- ☐ baby slept in room alone  
☐ mother ☐ father/partner  
☐ other children, how many?    
☐ other adults, how many?    
☐ pets

3. Does baby sleep in the **same** room during the day compared to where baby usually sleeps at night-time?

- ☐ Always ☐ Most of the time ☐ Sometimes ☐ Never

4. During the **last 2 weeks** did baby sleep in a room alone for day-time sleeps?

- ☐ Always ☐ Most of the time ☐ Sometimes ☐ Never

## Sleeping position

Please refer to the below sleep position drawings (A, B, C or D) to answer the following questions:

(A)

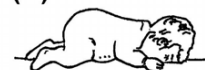

Lying on front with face down

(B)

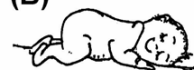

Lying on front with face to side

(C)

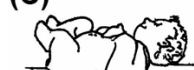

Lying on back

(D)

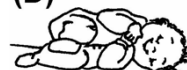

Lying on side

1. Which sleep position best describes how baby was placed to sleep **last night?**

- ☐ A ☐ B ☐ C ☐ D

2. Which sleep position best describes how baby was **usually** placed to sleep over the **last 2 weeks?**

- ☐ A ☐ B ☐ C ☐ D

3. Which sleep position best describes how baby was **usually** placed to sleep at **4 weeks old?**

- ☐ A ☐ B ☐ C ☐ D

4. Which sleep position(s) describe how baby has **ever** been placed to sleep? (tick all that apply)

- ☐ A ☐ B ☐ C ☐ D

## Bedding environment

1. What items did baby **usually** sleep with in their bed or sleeping place during the **last 2 weeks?**

(mark all that apply)

- ☐ pillow ☐ beanie/hat/hoodie  
☐ sheepskin ☐ cot bumper(s)  
☐ blankets ☐ doona/duvet  
☐ dummy ☐ soft toys (e.g. teddy)  
☐ rolled towels/blanket  
☐ positioning device/wedges  
☐ infant nest (explain type/brand) \_\_\_\_\_  
☐ other item(s): \_\_\_\_\_  
☐ none of these

2. What items has baby **ever** slept with in their bed or sleeping place? (mark all that apply)

- ☐ pillow ☐ beanie/hat/hoodie  
☐ sheepskin ☐ cot bumper(s)  
☐ blankets ☐ doona/duvet  
☐ dummy ☐ soft toys (e.g. teddy)  
☐ rolled towels/blanket  
☐ positioning device/wedges  
☐ infant nest (explain type/brand) \_\_\_\_\_  
☐ other item(s): \_\_\_\_\_  
☐ none of these

3. Did baby sleep on or with a pillow during the **last 2 weeks?** ☐ Yes ☐ No

-If YES, 3a) What kind of pillow did baby use?

- ☐ a baby pillow ☐ an adult pillow

3b) How was the pillow used? (mark all that apply)

- ☐ for baby's head ☐ for baby's whole body ☐ to stop baby rolling ☐ other \_\_\_\_\_

4. Has baby **ever** slept on or with a pillow? ☐ Yes ☐ No

5. Did baby sleep with any soft toys (e.g. teddy) during the **last 2 weeks?** ☐ Yes ☐ No

### Bed type/sleep surface

#### 1. What type of bed or sleeping surface did baby usually sleep on during the last 2 weeks for night time sleeps?

(please mark only **one** answer)

- |                                             |                                                                 |                                                           |
|---------------------------------------------|-----------------------------------------------------------------|-----------------------------------------------------------|
| <input type="radio"/> Cot                   | <input type="radio"/> Bassinet                                  | <input type="radio"/> Portable/Travel cot                 |
| <input type="radio"/> Double/Queen/King bed | <input type="radio"/> Single bed                                | <input type="radio"/> Mattress on floor                   |
| <input type="radio"/> Waterbed              | <input type="radio"/> Couch/Sofa/Armchair                       | <input type="radio"/> Beanbag                             |
| <input type="radio"/> Pēpi-pod              | <input type="radio"/> Infant Hammock                            | <input type="radio"/> Co-sleeper device/Nest on adult bed |
| <input type="radio"/> Baby capsule/Car seat | <input type="radio"/> Rocker/Swing/Bouncer                      | <input type="radio"/> Clip on co-sleeper cot/crib         |
| <input type="radio"/> Pram or Stroller      | <input type="radio"/> Other bed type or sleeping surface: _____ |                                                           |

#### 2. What type of bed or sleeping surface did baby usually sleep on during the last 2 weeks for day time sleeps?

(please mark only **one** answer)

- |                                                                 |                                                 |                                                           |
|-----------------------------------------------------------------|-------------------------------------------------|-----------------------------------------------------------|
| <input type="radio"/> Cot                                       | <input type="radio"/> Bassinet                  | <input type="radio"/> Portable/Travel cot                 |
| <input type="radio"/> Double/Queen/King bed                     | <input type="radio"/> Single bed                | <input type="radio"/> Mattress on floor                   |
| <input type="radio"/> Waterbed                                  | <input type="radio"/> Couch/Sofa/Armchair       | <input type="radio"/> Beanbag                             |
| <input type="radio"/> Pēpi-pod                                  | <input type="radio"/> Infant Hammock            | <input type="radio"/> Co-sleeper device/Nest on adult bed |
| <input type="radio"/> Baby capsule/Car seat                     | <input type="radio"/> Rocker/Swing/Bouncer      | <input type="radio"/> Clip on co-sleeper cot/crib         |
| <input type="radio"/> Pram or Stroller                          | <input type="radio"/> Infant carrier/Baby sling | <input type="radio"/> Rug/Playmat                         |
| <input type="radio"/> Other bed type or sleeping surface: _____ |                                                 |                                                           |

#### 3. During the last 2 weeks did baby sleep on the same bed or sleeping surface during the day compared to where baby usually sleeps at night-time?

- ☐ Always    ☐ Most of the time    ☐ Sometimes    ☐ Never

#### 4. What type of bed or sleeping surface has baby ever slept on when at home? (mark all that apply)

- |                                                                 |                                                 |                                                           |
|-----------------------------------------------------------------|-------------------------------------------------|-----------------------------------------------------------|
| <input type="radio"/> Cot                                       | <input type="radio"/> Bassinet                  | <input type="radio"/> Portable/Travel cot                 |
| <input type="radio"/> Double/Queen/King bed                     | <input type="radio"/> Single bed                | <input type="radio"/> Mattress on floor                   |
| <input type="radio"/> Waterbed                                  | <input type="radio"/> Couch/Sofa/Armchair       | <input type="radio"/> Beanbag                             |
| <input type="radio"/> Pēpi-Pod                                  | <input type="radio"/> Infant Hammock            | <input type="radio"/> Co-sleeper device/Nest on adult bed |
| <input type="radio"/> Baby capsule/Car seat                     | <input type="radio"/> Rocker/Swing/Bouncer      | <input type="radio"/> Clip on co-sleeper cot/Crib         |
| <input type="radio"/> Pram or Stroller                          | <input type="radio"/> Infant carrier/Baby sling | <input type="radio"/> Rug/Playmat                         |
| <input type="radio"/> Other bed type or sleeping surface: _____ |                                                 |                                                           |

#### 5. If not at home (e.g. visiting friends/family) when baby needs a sleep, what type of bed or sleeping surface has baby ever slept on? (mark all that apply)

- |                                                                 |                                                 |                                                           |
|-----------------------------------------------------------------|-------------------------------------------------|-----------------------------------------------------------|
| <input type="radio"/> Cot                                       | <input type="radio"/> Bassinet                  | <input type="radio"/> Portable/Travel cot                 |
| <input type="radio"/> Double/Queen/King bed                     | <input type="radio"/> Single bed                | <input type="radio"/> Mattress on floor                   |
| <input type="radio"/> Waterbed                                  | <input type="radio"/> Couch/Sofa/Armchair       | <input type="radio"/> Beanbag                             |
| <input type="radio"/> Pēpi-Pod                                  | <input type="radio"/> Infant Hammock            | <input type="radio"/> Co-sleeper device/Nest on adult bed |
| <input type="radio"/> Baby capsule/Car seat                     | <input type="radio"/> Rocker/Swing/Bouncer      | <input type="radio"/> Clip on co-sleeper cot/Crib         |
| <input type="radio"/> Pram or Stroller                          | <input type="radio"/> Infant carrier/Baby sling | <input type="radio"/> Rug/Playmat                         |
| <input type="radio"/> Other bed type or sleeping surface: _____ |                                                 |                                                           |

### Infant placement in cot for sleep

Please refer to the below drawings (A, B, C or D) to answer the following questions:

(A)

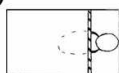

Head to top of cot

(B)

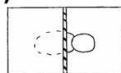

In middle of cot

(C)

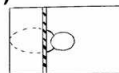

Feet to foot of cot

(D)

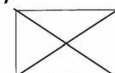

Baby did not sleep in cot

#### 1. Which drawing best describes baby's position when baby was placed to sleep in a cot or bassinet last night?

- ☐ A    ☐ B    ☐ C    ☐ D

#### 2. Which drawing best describes baby's usual position when placed in a cot or bassinet to sleep over the last 2 weeks for day or night-time sleeps?

- ☐ A    ☐ B    ☐ C    ☐ D

### Bed sharing

1. Has baby **ever** slept on any of the following sleep surfaces with another person who was sleeping at **any time since birth?** (mark all that apply)

- ☐ Cot/Bassinet                      ☐ Pēpi-Pod  
☐ Double/Queen/King bed        ☐ Single bed  
☐ Mattress on floor                ☐ Waterbed  
☐ Infant bed on adult bed        ☐ Portable/Travel cot  
☐ Couch/Sofa/Armchair          ☐ Beanbag  
☐ Other bed type or sleeping surface: \_\_\_\_\_  
☐ Baby has never shared a sleep surface

2. Was it **usually** planned to share the sleep surface with baby? ☐ Yes ☐ No

☐ Baby has never shared a sleep surface

3. Who has **ever** shared a sleep surface with baby?

(mark all that apply)

- ☐ Mother                      ☐ Father/partner  
☐ Other children            ☐ Other adult(s)  
☐ Pets  
☐ Nobody has ever shared a sleep surface with baby

4. How often does baby share a sleep surface?

- ☐ every night/normal routine  
☐ most nights (4-6 nights a week)  
☐ some nights (2-3 nights a week)  
☐ occasionally (about once a week or less often)  
☐ other: \_\_\_\_\_  
☐ Baby has never shared a sleep surface

5. How long does baby **usually** share a sleep surface?

- hours    ☐ Less than 1 hour  
☐ Baby has never shared a sleep surface

6. Has baby **ever** shared a sofa or couch with another person who was sleeping **at any time?**

☐ Yes ☐ No

7. Has baby slept on a sleep surface with another person who was sleeping **at any time** during the **last 2 weeks?** ☐ Yes ☐ No

-If **YES, 7a)** which of the following sleep surfaces does baby **usually** share? (mark all that apply)

- ☐ Cot/Bassinet                      ☐ Pēpi-Pod  
☐ Double/Queen/King bed        ☐ Single bed  
☐ Mattress on floor                ☐ Waterbed  
☐ Infant bed on an adult bed       ☐ Portable/travel cot  
☐ Couch/Sofa/Armchair          ☐ Beanbag  
☐ Other bed type or sleeping surface: \_\_\_\_\_

7b) Who does baby **usually** share a sleep surface with?

(mark all that apply)

- ☐ Mother                      ☐ Father/partner  
☐ Other adult(s), how many?    
☐ Other children, how many?    
☐ Pets

7c) Where in the shared sleep space does baby **usually** sleep? (please mark only **one** answer)

- ☐ between 2 people  
☐ between a person and the edge of the bed  
☐ in an infant bed on the adult bed  
☐ on a person  
☐ other: \_\_\_\_\_

### Smoking

1. Who in baby's household smokes? (mark all that apply)

- ☐ Mother ☐ Father/partner  
☐ Other household members, how many?    
☐ Nobody

2. Where do household members smoke? (mark all that apply)

- ☐ inside the house  
☐ outside the house  
☐ in the car  
☐ other: \_\_\_\_\_  
☐ household members do not smoke

3. Does anyone **ever** smoke in the room where baby sleeps? ☐ Yes ☐ No

4. Has baby's mother **ever** smoked cigarettes?

☐ Yes ☐ No

5. Did baby's birth mother smoke during pregnancy?

☐ Yes ☐ No

- If **YES**, how many cigarettes were smoked per day?

cigarettes per day

6. Has baby's mother/primary caregiver smoked **any** cigarettes since having baby? ☐ Yes ☐ No

### Immunisations

1. Was baby immunised at birth (i.e. did baby receive a Hepatitis B vaccination)? ☐ Yes ☐ No

2. Has baby had their **2 month old** immunisations? ☐ Yes ☐ No

-If **NO**, do you plan on immunising baby? ☐ Yes ☐ No

**Infant wrapping and infant sleeping bags**

**1. Has baby ever slept in an infant sleeping bag or commercially designed sleeping swaddle?**

☐ Yes ☐ No

- If **YES**, did the infant sleeping bag or swaddle have fitted neck and arm holes? ☐ Yes ☐ No

**2. In the last 2 weeks did you ever wrap baby for sleep time?** ☐ Yes ☐ No

-If **YES, 2a)** How many weeks old was baby when you started wrapping baby?

☐ less than 1 week old

weeks old

**2b)** What material do you usually use to wrap baby?

☐ cotton sheet/muslin cloth or sheet

☐ flannel sheet

☐ blanket/bunny rug

☐ other: \_\_\_\_\_

**2c)** When wrapping baby for sleep do you usually:

☐ wrap with arms in

☐ wrap with arms out

**2d)** When wrapping baby for sleep do you usually:

☐ wrap below shoulders

☐ wrap above shoulders but below chin

☐ wrap covering back of baby's head

**2e)** How do you usually wrap baby for sleep?

☐ very tight ☐ firm ☐ loose ☐ very loose

**2f)** How often do you wrap baby?

☐ almost all the time (when both awake and asleep)

☐ for every sleep time

☐ for most sleeps (both night and day)

☐ mostly night-time sleeps

☐ mostly day-time sleeps

☐ other: \_\_\_\_\_

**2g)** When do you plan to stop wrapping baby?

☐ around 3 months

☐ around 4 months

☐ around 5 months

☐ around 6 months

☐ when baby is more than 6 months old

☐ as soon as baby shows signs of being able to roll

☐ haven't thought about it/ don't know

**Adult worn infant carrier or sling**

**1. Have you ever received advice or read information about using an infant carrier or baby sling?** ☐ Yes ☐ No

**2. Have you ever used a baby sling or infant carrier with baby?** ☐ Yes ☐ No

-If **YES, 2a)** Which picture below best matches the style carrier/sling you usually use?

(please mark only one answer)

☐ OA

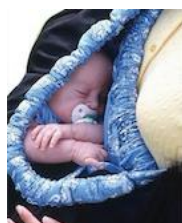

Sling (over shoulder) style

☐ OB

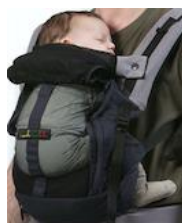

Carrier (pack) style

☐ OC

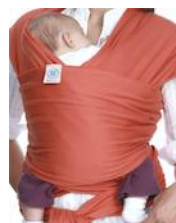

Wrap-around style

☐ Other \_\_\_\_\_

**2b)** Has baby ever slept in the carrier or sling? ☐ Yes ☐ No

**2c)** Can baby's chin touch his/her chest when in the carrier? ☐ Yes ☐ No

**3. Have you ever heard of the T.I.C.K.S principle when using a baby sling or infant carrier?** ☐ Yes ☐ No

**Heating/Cooling**

**1. Was baby's room heated or cooled at any time last night?** ☐ Yes ☐ No

-If **YES**, what type of heating or cooling was used?

☐ thermostatic controlled heating

☐ other type of heating \_\_\_\_\_

☐ thermostatic controlled cooling

☐ other type of cooling \_\_\_\_\_

### Baby monitors

**1. Do you use a baby monitor while baby is sleeping?**

☐ Yes ☐ No

- If **YES, 1a) What type of baby monitoring system do you use?** (mark all that apply)

- ☐ Sound monitor ☐ Video monitor  
☐ Movement/Breathing mat or sensor  
☐ Other: \_\_\_\_\_

**1b) Who recommended using a baby monitor?**

- ☐ Advice from doctor/health professional  
☐ Received as a gift  
☐ Parental choice  
☐ Friend or family member  
☐ Other: \_\_\_\_\_

### Other care practices

**1. Have you ever covered baby's pram, carrier or sling with a wrap or blanket to block out light/distractions to help baby sleep?** ☐ Yes ☐ No**2. Does baby ever wear a necklace (e.g. an amber teething necklace)?** ☐ Yes ☐ No

-If **YES**, does baby ever wear the necklace during sleep? ☐ Yes ☐ No

### Baby's health

**1. How long was baby in hospital after birth before being discharged home?**

- ☐ Baby was not born in/taken to hospital at birth  
☐ Less than 1 day old  
  days old  
☐ 100 or more days old  
☐ Baby is still in hospital – has not yet been home

**2. Has baby stayed overnight in hospital (e.g. in a children's ward) for observation or treatment since being discharged home after birth?** ☐ Yes ☐ No

- If **YES, 2a) How old was baby when admitted to hospital?**

- ☐ less than 1 week old  
  weeks old

**2b) What was the main reason for baby going to hospital?**

- ☐ breathing problems/respiratory illness  
☐ feeding problems/weight loss  
☐ high temperature ☐ pain  
☐ vomiting/diarrhoea ☐ jaundice  
☐ other: \_\_\_\_\_

**2c) Where did baby sleep while in hospital?** (mark all that apply)

- ☐ plastic bassinet ☐ hospital cot  
☐ baby capsule/car seat ☐ pram or stroller  
☐ hospital bed with mother/caregiver  
☐ sofa chair/pull-out parent bed with mother/caregiver  
☐ other: \_\_\_\_\_

### Recommendations

**Which sleep position(s) is recommended for healthy babies?** (mark all that apply)

- ☐ Lying on back on flat surface ☐ Lying on back with head elevated (i.e. tilted surface)  
☐ Lying on side on flat surface ☐ Lying on side with head elevated  
☐ Lying on tummy/front on flat surface ☐ Lying on tummy/front with head elevated  
☐ I'm not sure/ don't know

**Which sleep position(s) is recommended for babies with reflux?** (mark all that apply)

- ☐ Lying on back on flat surface ☐ Lying on back with head elevated (i.e. tilted surface)  
☐ Lying on side on flat surface ☐ Lying on side with head elevated  
☐ Lying on tummy/front on flat surface ☐ Lying on tummy/front with head elevated  
☐ I'm not sure/ don't know

Select the answer you believe to be the main key messages for safe sleeping\* (please mark only one answer)

- ☐ Immunise baby; Sleep baby on back or side; Keep baby smoke-free; Keep head and face uncovered; Use a dummy; Breastfeed baby; Room-share with baby
- ☐ Sleep baby on back; Keep baby smoke-free; Keep head and face uncovered; Bed-share with baby; Safe sleep environment night and day; Immunise baby
- ☐ Immunise baby; Sleep baby on back or side; Keep baby smoke-free; Use a dummy; Safe sleep environment night and day; Avoid baby overheating; Breastfeed baby
- ☐ Sleep baby on back; Keep head and face uncovered; Keep baby smoke-free; Safe sleep environment night and day; Room-share with baby; Breastfeed baby
- ☐ None of the above
- ☐ I'm not sure/don't know

### Caregiver's Details

1. Mother's date of birth?   /   /

2. Mother's Indigenous status?

- ☐ Aboriginal
- ☐ Torres Strait Islander
- ☐ Aboriginal & Torres Strait Islander
- ☐ Neither Aboriginal or Torres Strait Islander

3. Mother's country of birth?

- ☐ Australia
- ☐ Other: \_\_\_\_\_

4. Mother's current marital status:

- ☐ Married ☐ De facto
- ☐ Single (never married)
- ☐ Single (separated, divorced)
- ☐ Single (widowed)

5. Is this your first baby?

- ☐ Yes ☐ No

- If **No**, how many other children have you given birth to?   children

6. Do you have a healthcare card? ☐ Yes ☐ No

7. What is your highest level of completed education?

- ☐ <Year 10 ☐ Year 10 ☐ Year 11 ☐ Year 12
- ☐ TAFE ☐ University ☐ Post Graduate Studies

8. Have you had an alcoholic drink of any kind since the birth of baby? ☐ Yes ☐ No

- If **YES**, how often since baby's birth have you consumed alcohol?
- ☐ every day
  - ☐ 5-6 days a week
  - ☐ 3-4 days a week
  - ☐ 1-2 days a week
  - ☐ 2-3 days a month
  - ☐ about 1 day a month
  - ☐ less than once a month

9. Do you take any medication or drugs (either prescribed, over the counter or illicit) that sometimes makes you drowsy or sleepy? ☐ Yes ☐ No

- If **YES**, please list types/names of medications/drugs:

### Other

Is there anything else you would like to share with us about baby's care and sleeping routines?

---

---

---

---

*Thank you for participating in the 2017 Queensland Infant Care Study.  
Your time and contribution is greatly valued and appreciated.*

If you are interested in receiving information about future research projects exploring the care of infants and children please provide your contact details through our secure link at <https://survey.usc.edu.au/opinio/s?s=6712>.
