# Supplementary material for: Awareness of infant safe sleep messages and associated care practices: findings from an Australian cohort of families with young infants
Source: PubMed Central journal article supplement — BMJ Paediatr Open. 2021 Feb 24;5(1):e000972. doi: 10.1136/bmjpo-2020-000972 (PMC7908297; doi:10.1136/bmjpo-2020-000972), 2021-02-24
Supplement: bmjpo-2020-000972supp002.pdf [file bmjpo-2020-000972supp002.pdf]

## Online Supplemental Table – Univariable analysis of characteristics and awareness of key messages

|                                                     | Total<br>n (%) | Prompted awareness:<br>Multi-choice selection of the current 6-key<br>safe sleeping program messages |                                           | p-value           |
|-----------------------------------------------------|----------------|------------------------------------------------------------------------------------------------------|-------------------------------------------|-------------------|
|                                                     |                | Incorrect /<br>unsure<br>n (%)                                                                       | Correct selection of<br>messages<br>n (%) |                   |
| <b>Maternal age</b> (n=3252)                        |                |                                                                                                      |                                           |                   |
| 24 years or younger                                 | 271 (8.3)      | 128 (47.2)                                                                                           | 143 (52.8)                                | <b>&lt;0.0001</b> |
| 25 years or older                                   | 2981 (91.7)    | 726 (24.4)                                                                                           | 2255 (75.7)                               |                   |
| <b>Parity</b> (n=3290)                              |                |                                                                                                      |                                           |                   |
| Primiparous                                         | 1496 (45.5)    | 386 (25.8)                                                                                           | 1110 (74.2)                               | 0.5362            |
| Multiparous                                         | 1794 (55.5)    | 480 (26.8)                                                                                           | 1314 (73.2)                               |                   |
| <b>Marital status</b> (n=3284)                      |                |                                                                                                      |                                           |                   |
| Single [never married, separated, widowed]          | 159 (4.8)      | 68 (42.8)                                                                                            | 91 (57.2)                                 | <b>&lt;0.0001</b> |
| Partnered [married/de facto]                        | 3125 (95.2)    | 796 (25.5)                                                                                           | 2329 (74.5)                               |                   |
| <b>Country of birth</b> (n=3284)                    |                |                                                                                                      |                                           |                   |
| Overseas born                                       | 730 (22.2)     | 218 (29.9)                                                                                           | 512 (70.1)                                | <b>0.013</b>      |
| Australian born                                     | 2554 (77.8)    | 646 (25.3)                                                                                           | 1908 (74.7)                               |                   |
| <b>Indigenous status</b> (n=3267)                   |                |                                                                                                      |                                           |                   |
| Aboriginal and/or Torres Strait Islander            | 62 (1.9)       | 29 (46.7)                                                                                            | 33 (52.2)                                 | <b>0.0002</b>     |
| Neither Aboriginal nor Torres Strait Islander       | 3205 (98.1)    | 829 (25.9)                                                                                           | 2376 (74.1)                               |                   |
| <b>Education level</b> (n=3284)                     |                |                                                                                                      |                                           |                   |
| Less than tertiary completed                        | 834 (25.4)     | 337 (40.4)                                                                                           | 497 (59.6)                                | <b>&lt;0.0001</b> |
| Tertiary completed                                  | 2450 (74.6)    | 524 (21.4)                                                                                           | 1926 (78.6)                               |                   |
| <b>Smoking status while pregnant</b> (n=3282)       |                |                                                                                                      |                                           |                   |
| Smoked during pregnancy                             | 135 (4.1)      | 60 (44.4)                                                                                            | 75 (55.6)                                 | <b>&lt;0.0001</b> |
| Smoke-free during pregnancy                         | 3147 (95.9)    | 805 (25.6)                                                                                           | 2342 (74.4)                               |                   |
| <b>Household smoke exposure</b> (n=3292)            |                |                                                                                                      |                                           |                   |
| Exposed                                             | 536 (16.3)     | 200 (37.3)                                                                                           | 336 (62.7)                                | <b>&lt;0.0001</b> |
| Smoke-free                                          | 2756 (83.7)    | 669 (24.3)                                                                                           | 2087 (75.7)                               |                   |
| <b>Socioeconomic status*</b> (n=3287)               |                |                                                                                                      |                                           |                   |
| Most disadvantaged quintile                         | 491 (14.9)     | 170 (34.6)                                                                                           | 321 (65.4)                                | <b>&lt;0.0001</b> |
| Not most disadvantaged quintile                     | 2796 (85.1)    | 729 (26.1)                                                                                           | 2067 (73.9)                               |                   |
| <b>Geographical location*</b> (n=3287)              |                |                                                                                                      |                                           |                   |
| Very remote, remote, outer regional                 | 525 (16.0)     | 166 (31.6)                                                                                           | 359 (68.4)                                | <b>0.0167</b>     |
| Inner regional, major city                          | 2762 (84.0)    | 733 (26.5)                                                                                           | 2029 (73.5)                               |                   |
| <b>Model of maternity care</b> (n=3303)             |                |                                                                                                      |                                           |                   |
| Public                                              | 1926 (58.3)    | 618 (31.1)                                                                                           | 1308 (67.9)                               | <b>&lt;0.0001</b> |
| Private                                             | 1377 (41.7)    | 289 (21.0)                                                                                           | 1088 (79.0)                               |                   |
| <b>Antenatal care*</b> (n=3292)                     |                |                                                                                                      |                                           |                   |
| Adequate                                            | 3020 (91.7)    | 795 (26.3)                                                                                           | 2225 (73.7)                               | <b>0.0051</b>     |
| Not adequate                                        | 272 (8.3)      | 93 (34.2)                                                                                            | 179 (65.8)                                |                   |
| <b>SCN/NICU admission</b> (n=3303)                  |                |                                                                                                      |                                           |                   |
| Yes                                                 | 522 (15.8)     | 151 (28.9)                                                                                           | 371 (71.1)                                | 0.3217            |
| No                                                  | 2781 (84.2)    | 746 (26.8)                                                                                           | 2035 (73.2)                               |                   |
| <b>Gestation</b> (n=3286)                           |                |                                                                                                      |                                           |                   |
| Term, ≥37 weeks                                     | 3074 (93.5)    | 815 (26.5)                                                                                           | 2259 (73.5)                               | 0.0772            |
| Preterm, <37 weeks                                  | 212 (6.5)      | 68 (32.1)                                                                                            | 144 (67.9)                                |                   |
| <b>Heard of terms SUDI &amp; SIDS</b> (n=3317)      |                |                                                                                                      |                                           |                   |
| No                                                  | 139 (4.2)      | 66 (47.5)                                                                                            | 73 (52.5)                                 | <b>&lt;0.0001</b> |
| Yes                                                 | 3178 (95.8)    | 829 (26.1)                                                                                           | 2349 (73.9)                               |                   |
| <b>Nurse/Midwife main source of advice</b> (n=3228) |                |                                                                                                      |                                           |                   |
| No                                                  | 1655 (51.3)    | 441 (26.6)                                                                                           | 1214 (73.3)                               | <b>&lt;0.0001</b> |
| Yes                                                 | 1573 (48.7)    | 419 (26.6)                                                                                           | 1154 (73.4)                               |                   |
| <b>Infant usually supine to sleep</b> (n=3310)      |                |                                                                                                      |                                           |                   |
| Yes                                                 | 2746 (83.0)    | 672 (24.5)                                                                                           | 2074 (75.5)                               | <b>&lt;0.0001</b> |
| No                                                  | 564 (17.0)     | 215 (38.1)                                                                                           | 349 (61.9)                                |                   |

|                                                         |             |            |             |                   |
|---------------------------------------------------------|-------------|------------|-------------|-------------------|
| <b>Ever non-supine sleep position (n=3307)</b>          |             |            |             |                   |
| Yes                                                     | 1474 (44.6) | 453 (30.7) | 1021 (69.3) | <b>&lt;0.0001</b> |
| No                                                      | 1833 (55.4) | 432 (23.6) | 1401 (76.4) |                   |
| <b>Cot usually free of soft, bulky bedding (n=3301)</b> |             |            |             |                   |
| Yes                                                     | 2061 (62.4) | 451 (21.9) | 1610 (78.1) | <b>&lt;0.0001</b> |
| No                                                      | 1240 (37.6) | 434 (35.0) | 806 (65.0)  |                   |
| <b>Any breastmilk at 8 weeks (n=3321)</b>               |             |            |             |                   |
| Yes                                                     | 2751 (82.8) | 652 (23.7) | 2099 (76.3) | <b>&lt;0.0001</b> |
| No                                                      | 570 (17.2)  | 254 (44.6) | 316 (55.4)  |                   |
| <b>Usually sleeps in room alone (n=3306)</b>            |             |            |             |                   |
| Yes                                                     | 1252 (37.9) | 382 (30.5) | 870 (69.5)  | <b>0.0002</b>     |
| No                                                      | 2054 (62.1) | 504 (24.5) | 1550 (75.5) |                   |
| <b>Infant ever shared sleep surface (n=3296)</b>        |             |            |             |                   |
| Yes                                                     | 2525 (76.6) | 683 (27.1) | 1842 (73.0) | 0.1851            |
| No                                                      | 771 (23.4)  | 190 (24.6) | 581 (75.4)  |                   |

\*The Socio-Economic Indexes for Areas (SEIFA) – Index of Relative Socio-Economic Advantage and Disadvantage Quintile was used to determine the socioeconomic status of the area where the infant's family reported to live. For analysis a dichotomous variable was used either being in the most disadvantaged quintile or not. <sup>1</sup>

\*The Accessibility/Remoteness Index of Australia (ARIA+) divides Australia into classes of remoteness based on relative access to services and was used to assess and report geographical location. To create a dichotomous variable for analysis geographic location was grouped major city and inner regional, and outer regional, remote and very remote. <sup>2</sup>

\*The Kotelchuck Adequacy of Prenatal Care Utilisation Index was used to determine adequacy of antenatal care.

Gestational at first antenatal care, number of antenatal visits and gestation at delivery were used to index care as adequate or not adequate. To create a dichotomous variable 'adequate' grouped "adequate-plus" and "adequate," and 'not adequate' grouped "intermediate" and "inadequate". <sup>3</sup>

## References

1. Australian Bureau of Statistics [ABS]. 2033.0.55.001 - Census of Population and Housing: Socio-Economic Indexes for Areas (SEIFA), Australia, 2016 Canberra: Australian Bureau of Statistics; 2018 [Available from: <https://www.abs.gov.au/ausstats/abs@.nsf/mf/2033.0.55.001> accessed 5 September 2019.
2. Australian Bureau of Statistics [ABS]. 1270.0.55.005 - Australian Statistical Geography Standard (ASGS): Volume 5 - Remoteness Structure, July 2016 Canberra: Australian Bureau of Statistics; 2018 [Available from: <https://www.abs.gov.au/websitedbs/d3310114.nsf/home/remoteness+structure> accessed 5 September 2019.
3. Kotelchuck M. An evaluation of the Kessner Adequacy of Prenatal Care Index and a proposed Adequacy of Prenatal Care Utilization Index. *Am J Public Health* 1994;84(9):1414-20. doi: 10.2105/ajph.84.9.1414
